# Supplementary material for: Synthesis of lanthanide-doped NaYF4@TiO2 core–shell composites with highly crystalline and tunable TiO2 shells under mild conditions and their upconversion-based photocatalysis
Source: Royal Society of Chemistry journal article supplement (doi:10.1039/c3nr03051b), 2013-01-01
Supplement: c3nr03051b.pdf [file c3nr03051b.pdf]

## Supporting Information

### **Synthesis of lanthanide-doped NaYF<sub>4</sub>@TiO<sub>2</sub> core-shell composites with highly crystalline and tunable TiO<sub>2</sub> shells under mild conditions and their upconversion-based photocatalysis**

*Yuewei Zhang, Zhanglian Hong\**

*State Key Laboratory of Silicon Materials, Department of Materials Science and Engineering, Zhejiang University, Hangzhou 310027, China.*

*E-mail: hong\_zhanglian@zju.edu.cn Fax: (+86) 571 8795 1234*

## 1. Experimental

### Materials

$\text{YCl}_3 \cdot 6\text{H}_2\text{O}$  (99.99%),  $\text{YbCl}_3 \cdot 6\text{H}_2\text{O}$  (99.99%),  $\text{TmCl}_3 \cdot 6\text{H}_2\text{O}$  (99.99%), NaOH (98+%),  $\text{NH}_4\text{F}$  (98+%) and oleic acid (90%), PVP-40 (99%) were all purchased from Sigma-Aldrich.  $\text{TiF}_4$  (99%) was purchased from Acros. All raw materials were used as starting materials without further purification.

### Synthesis of the microrods

A 1.5 mL deionized water solution of 0.3 g NaOH was mixed with 5 mL ethanol and 5 mL oleic acid under stirring. 2 mL 0.2 M  $\text{RECl}_3$  mixture solution (Y:Yb:Tm = 70:30:0.5) and 1 mL 2 M  $\text{NH}_4\text{F}$  was selectively added into the above solution. Then the solution was transferred into a 20 mL of Teflon-lined autoclave and heat at 220 °C for 12 h. The obtained rods were collected by centrifugation, washed with deionized water and ethanol several times.

### Synthesis of the nanorods

A 1.5 mL deionized water solution of 0.3 g NaOH was mixed with 5 mL ethanol and 5 mL oleic acid under stirring. 2 mL 0.2 M  $\text{RECl}_3$  mixture solution (Y:Yb:Gd:Tm = 40:30:30:0.5) and 1 mL 2 M  $\text{NH}_4\text{F}$  was selectively added into the above solution. Then the solution was transferred into a 20 mL of Teflon-lined autoclave and heat at 200 °C for 3 h. The obtained rods were collected by centrifugation, washed with deionized water and ethanol several times.

### Remove the ligand on rods

The as-prepared oleic acid-capped rods were dispersed in a 0.1 M HCl solution, followed by ultrasonication to remove the surface ligands. After the reaction, the nanoparticles were collected via centrifugation. The resulting products were washed with deionized water and ethanol several times, and kept in deionized water.

### Hydrothermal coating of $\text{TiO}_2$ .

**Microcomposites:** Typically, 0.2 mmol as-prepared ligand-free  $\text{NaYF}_4\text{:Yb,Tm}$  microrods were transferred into 4 mL 0.2 g/mL PVP-40 solution with the aid of stirring and ultrasonication. Then 20 mL ethanol was added under stirring for more than 30 min. 4 mL 0.04 M  $\text{TiF}_4$  was dropwise added into the solution under stirring. Then the whole solution was transferred into a 40 mL Teflon-lined autoclave and heat at 180 °C for 4 h. Finally the as-prepared products were collected by centrifugation, washed with deionized water and ethanol several times and dried at 90 °C.

**Nanocomposites:** Similar to the procedures for microrods, except for varying the amount of  $\text{NaYF}_4\text{:Yb,Tm,Gd}$  nanorods and fixing the amount of  $\text{TiF}_4$ . The concentration of  $\text{TiF}_4$  is 0.04 M and the molar ratio of  $(\text{NaYF}_4\text{:Yb,Tm,Gd}):(\text{TiF}_4)$  is varied from 1:2 to 1:10.

**$\text{TiO}_2$  nanoflowers:** Similar to the procedures for microrods, except for adding no fluorides rods into the solution.

## 2. Characterization

Low-resolution transmission electron microscopy (**TEM**) measurements were carried out on a JEL-1400 transmission electron microscope (JEOL) operating at an acceleration voltage of 120 kV. High-resolution transmission electron microscopy (**HRTEM**) measurements were carried out on a Tecnai G2 F20 S-TWIN transmission electron microscope (FEI) operating at an acceleration voltage of 200 kV. Scanning electron microscopy (**SEM**) was performed on a FEI NOVA NanoSEM 230 scanning electron microscope operated at 5 kV. Powder X-ray diffraction (**XRD**) data were recorded on a Siemens D5005 X-ray diffractometer with CuK  $\alpha$  radiation (1.5406 Å). UV-vis transmission spectrum was recorded on a Shimadzu UV-2450 spectrophotometer. Photoluminescence (**PL**) spectra were recorded at room temperature with a DM150i monochromator equipped with a R928 photon counting photomultiplier tube (PMT), in conjunction with a 980 nm diode laser. Time-resolved fluorescence decay curves were measured by a fluorescence spectrometer (FLS920, Edinburgh) equipped with a 980 nm pulsed laser.

### 3. Photocatalytic measurements

In a typical photocatalytic test, 1 mL 5 mg/L methylene blue (MB) solution was added into a small glass bottle kept with 10 mg as-prepared products. The mixture of catalysts, solution and dyes was kept in dark for 12 h. Then a 1.5 W 980 nm diode laser (Sintec Optronics) was used as the irradiation source. After irradiation for a designated time, 0.05 mL of the MB aqueous solution was taken out, diluted with 0.95 mL DI water and followed by centrifugation. The supernatant was taken out for UV-Vis absorption spectrum measurement. The relative concentration of residual MB solution ( $C/C_0$ ) at each time interval was determined by the ratio of intensity of the characteristic absorption peak of MB (663 nm) to the initial one.

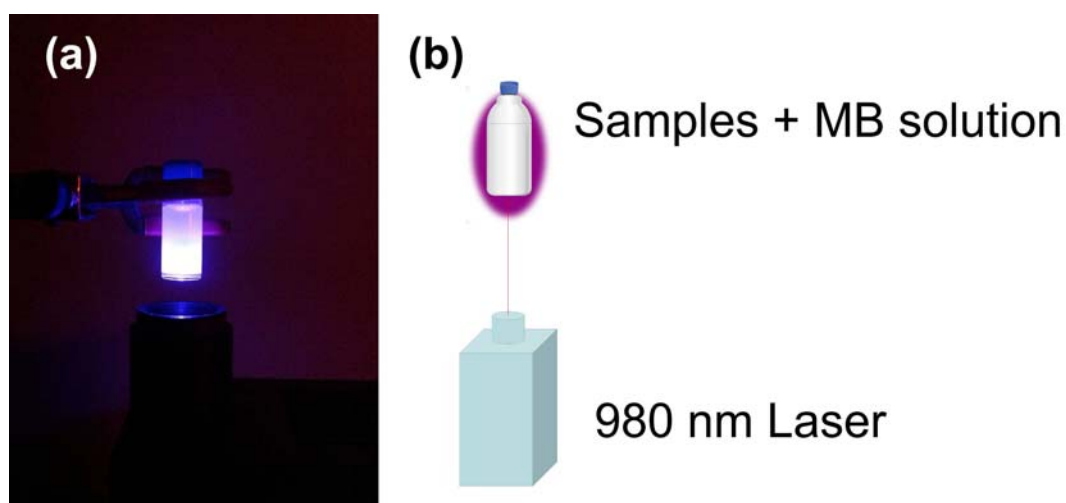

**Fig. S1** (a) The optical image of the MB solution with  $\text{NaYF}_4:\text{Yb,Tm}@\text{TiO}_2$  under 980 nm laser irradiation and (b) Scheme of the near-infrared photocatalytic experiment.

## 4. Size distribution

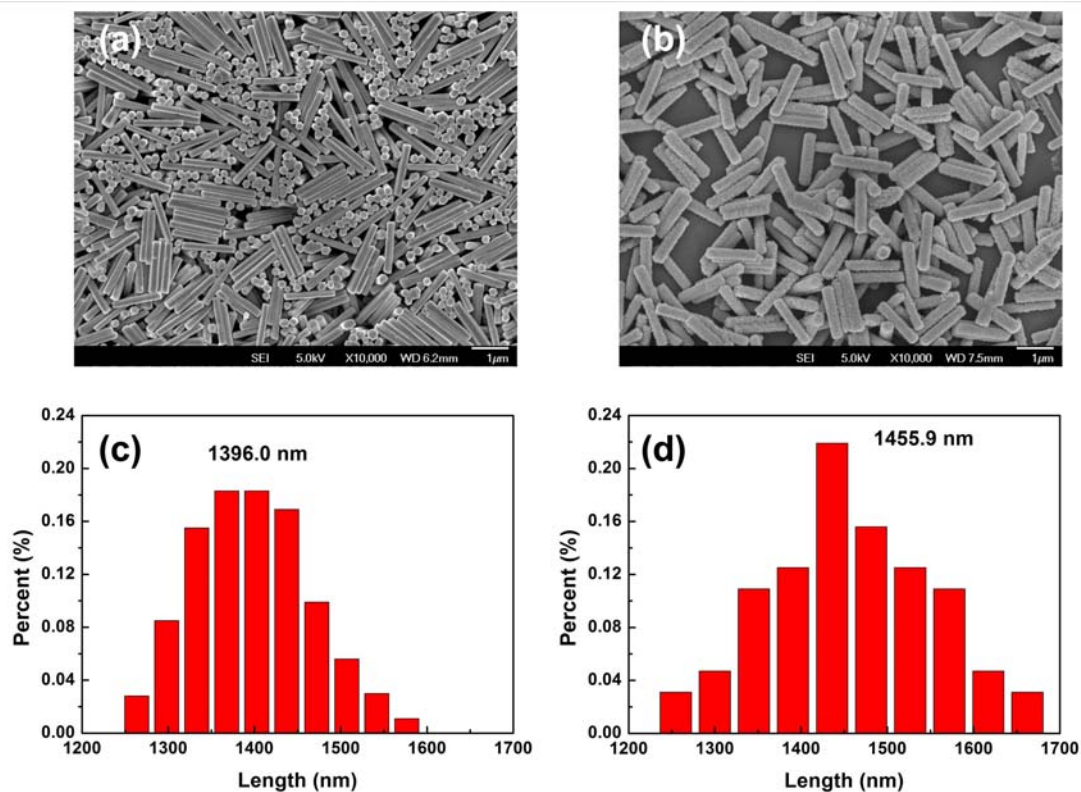

**Fig. S2** (a) SEM image and (c) Corresponding length distribution of NaYF<sub>4</sub>:Yb,Tm microrods; (b) SEM image and (d) Corresponding length distribution of NaYF<sub>4</sub>:Yb,Tm@TiO<sub>2</sub> composites (0.04 M TiF<sub>4</sub>).

\*After coating of TiO<sub>2</sub> shell, the size of rods is increased while the size distribution is slightly broadened.

## 5. Influence of PVP

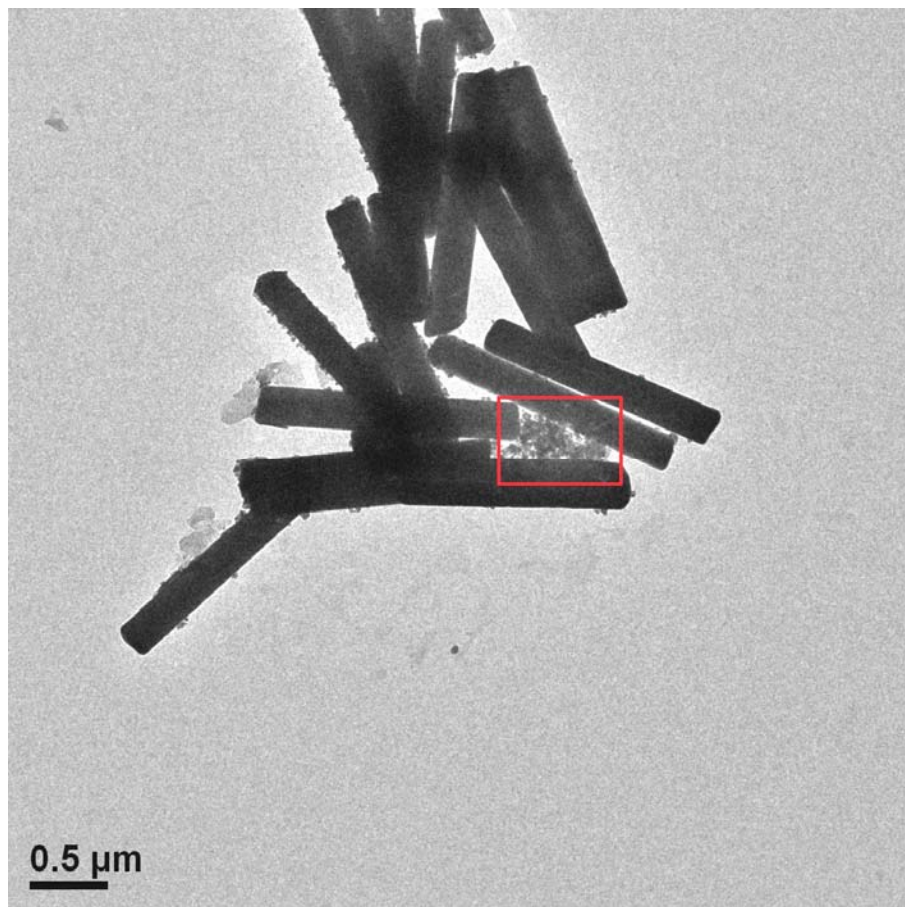

**Fig. S3** TEM image of the NaYF<sub>4</sub>:Yb,Tm/TiO<sub>2</sub> samples synthesized without PVP (Highlight: agglomerated TiO<sub>2</sub>).

\*The concentration of TiF<sub>4</sub> was fixed at 0.04 M. Without the presence of PVP, no continuous shell was formed and the self-aggregation of TiO<sub>2</sub> was observed. It indicates that, without PVP, the rods easily precipitated to the bottom of the solution hence very little amount of TiF<sub>4</sub> was coated on the TiF<sub>4</sub>. More TiO<sub>2</sub> particles were self-nucleated and agglomerated. Consequently, PVP is of great importance to the successful coating. [X. W. Lou and L. A. Archer, *Adv. Mat.*, 2008, **20**, 1853]

## 6. Treatment with Titanium alkoxide

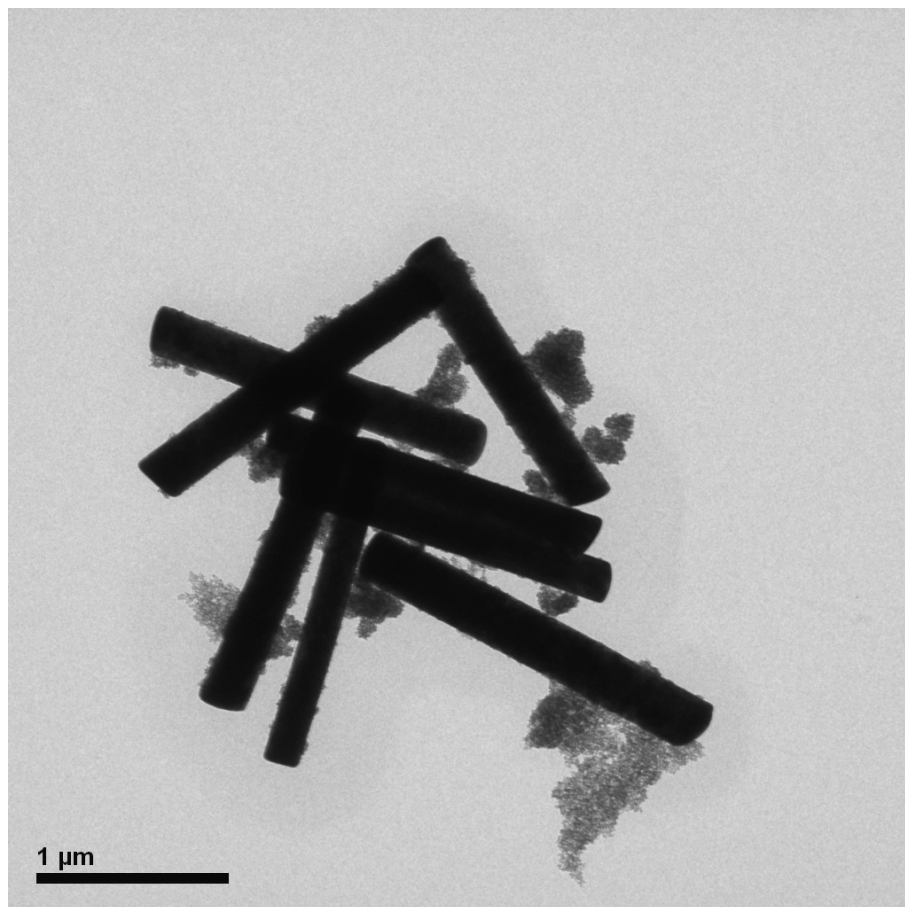

**Fig. S4** TEM image of the NaYF<sub>4</sub>:Yb,Tm/TiO<sub>2</sub> samples synthesized with Titanium butoxide.

\*The hydrothermal process is similar to the typical coating, except to replace the TiF<sub>4</sub> to Titanium butoxide with same Titanium amount (0.16 mmol). No continuous shell was formed and the self-aggregation of TiO<sub>2</sub> was observed.

## 7. Treatment with nanoplates

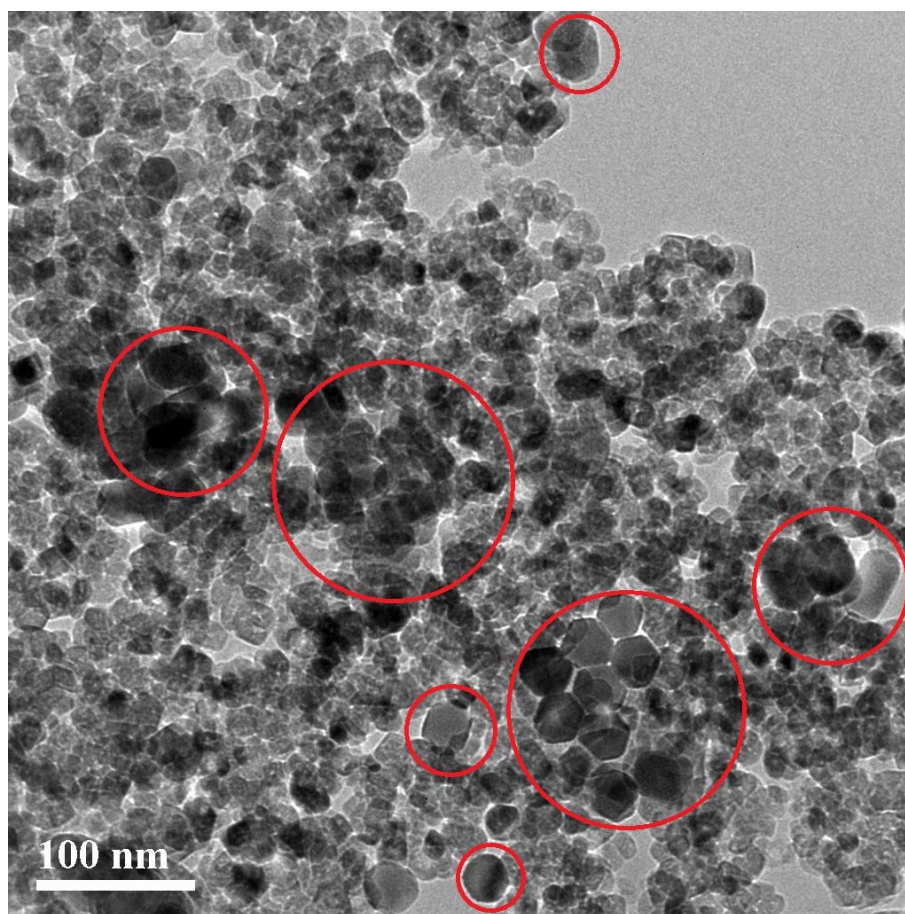

**Fig. S5** TEM image of the NaYF<sub>4</sub>:Yb,Tm/TiO<sub>2</sub> samples synthesized with NaYF<sub>4</sub>:Yb,Tm nanoplates (Highlight: fluoride nanoplates).

\*The hydrothermal process is similar to the typical coating, except to replace NaYF<sub>4</sub>:Yb,Tm rods to nanoplates. No core/shell structure is achieved.



## 8. Energy-dispersive X-ray spectroscopy (EDX)

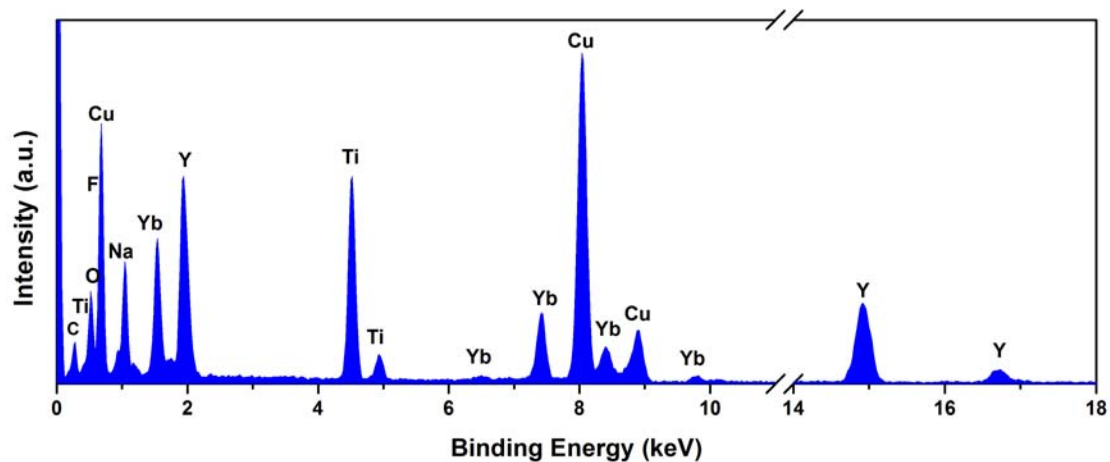

**Fig. S6** EDX analysis of NaYF<sub>4</sub>:Yb,Tm@TiO<sub>2</sub> (0.04 M TiF<sub>4</sub>).

**Table S1.** Relative elements amount in NaYF<sub>4</sub>:Yb,Tm@TiO<sub>2</sub> (0.04 M TiF<sub>4</sub>)

| Element       | Weight (%) | Atomic (%) |
|---------------|------------|------------|
| C             | 2.2        | 8.01       |
| O             | 4.44       | 12.12      |
| F             | 11.77      | 27.09      |
| Na            | 4.39       | 8.34       |
| Ti            | 11.29      | 10.31      |
| Cu            | 29.37      | 20.2       |
| Y             | 19.67      | 9.67       |
| Yb            | 16.86      | 4.26       |
| <b>Totals</b> | <b>100</b> | <b>100</b> |

\* The C and Cu elements were derived from the carbon-supported copper grid for TEM.

## 9. PL ratio

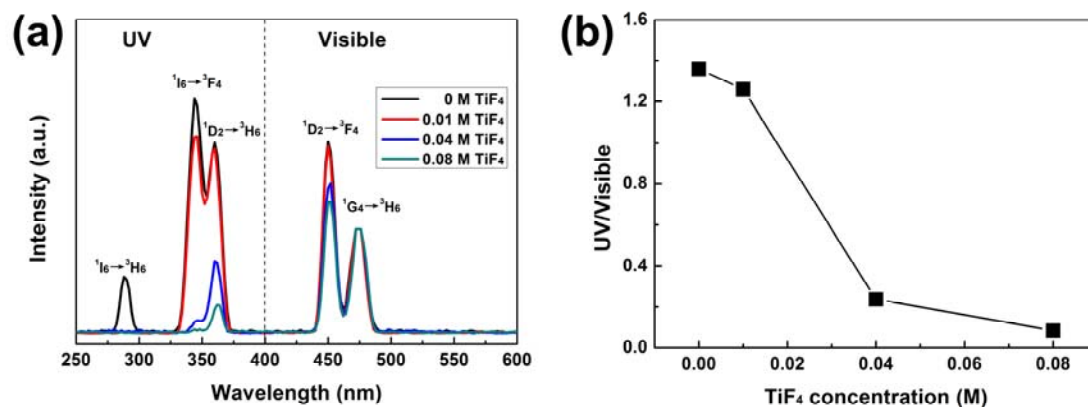

**Fig. S7** (a) Upconversion PL spectra of  $NaYF_4:Yb,Tm$  and  $NaYF_4:Yb,Tm@TiO_2$  with different  $TiF_4$  concentration (Normalized at 476 nm), (b) Relative ratio of integrated intensity of UV peaks vs. visible light peaks.

## 10. Photoluminescence dynamic curves

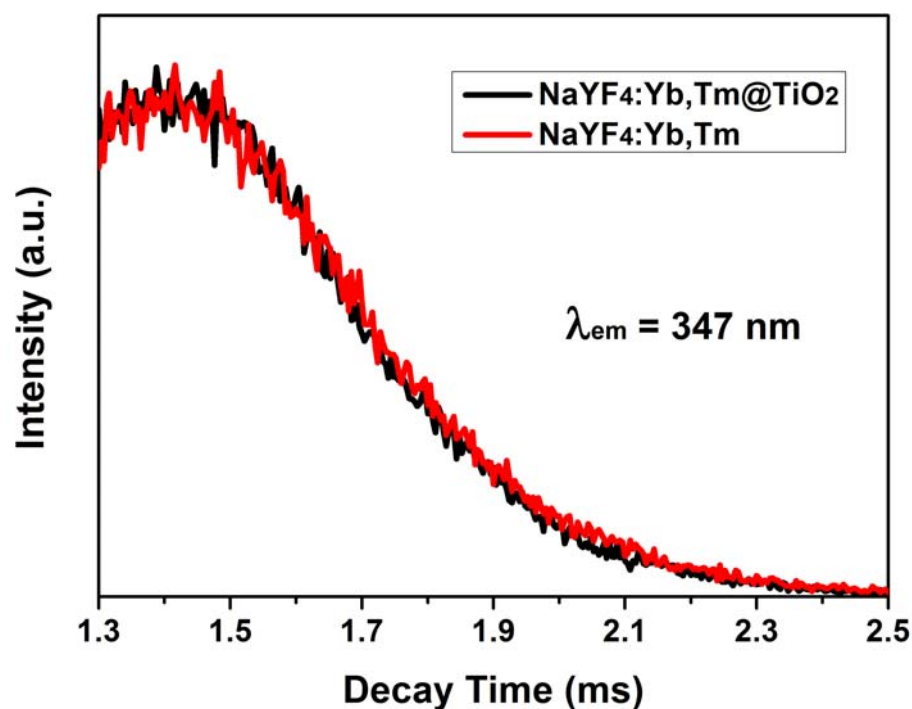

**Fig. S8** Time-resolved fluorescence decay curves of  $\text{Tm}^{3+}$  ( $\lambda_{em} = 347 \text{ nm}$ ) of as-prepared samples recorded upon 980 nm NIR excitation.

\* No significant decrease of average decay time is observed after  $\text{TiO}_2$  coating. The result indicates that the mechanism of energy transfer in this core/shell structure is the classical radiation-reabsorption process, rather than Förster resonance energy transfer (FRET) [Y. Tang, W. Di, X. Zhai, R. Yang and W. Qin, *Acs Catal.*, 2013, **3**, 405].

## 11. Detection of free radicals

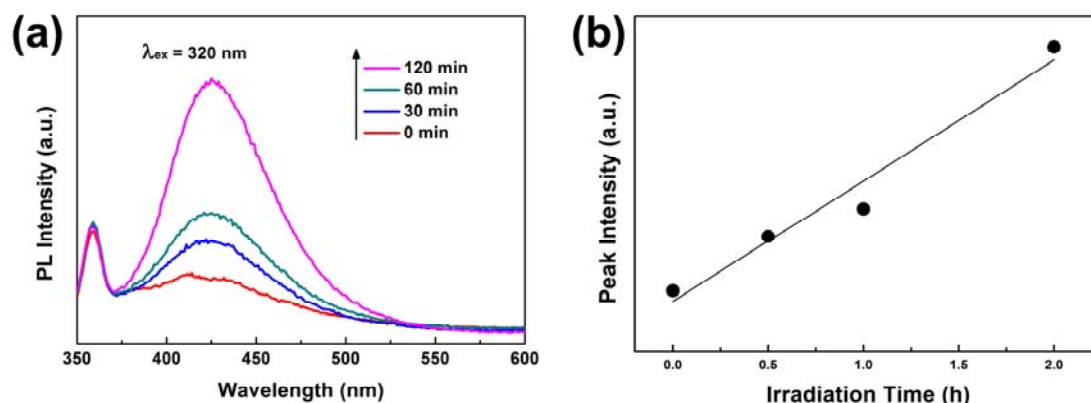

**Fig. S9** (a) Time-dependent fluorescence spectra of the terephthalic acid solution containing 10 mg of  $\text{NaYF}_4:\text{Yb,Tm}@TiO_2$  core/shell composite under near-infrared irradiation and (b) the integration of the emission of hydroxyterephthalic acid as a function of NIR irradiation time in the presence of  $\text{NaYF}_4:\text{Yb,Tm}@TiO_2$

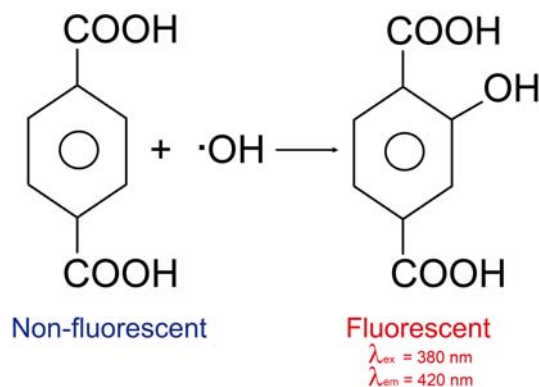

\*The generation of radicals in solution was detected by the photoluminescence measurement with terephthalic acid as a probe molecule. The procedure was similar to that of the photocatalytic activity test except that the dye aqueous solution was replaced by the terephthalic acid and NaOH mixture aqueous solution. [C. Li, F. Wang, J. Zhu, and J. C. Yu, *Appl. Catal. B-Environ.*, 2010, **100**, 433; N. Zhang, S. Liu, X. Fu and Y. J. Xu, *J. Phys. Chem. C*, 2011, **115**, 9136.]

## 11. Optical images

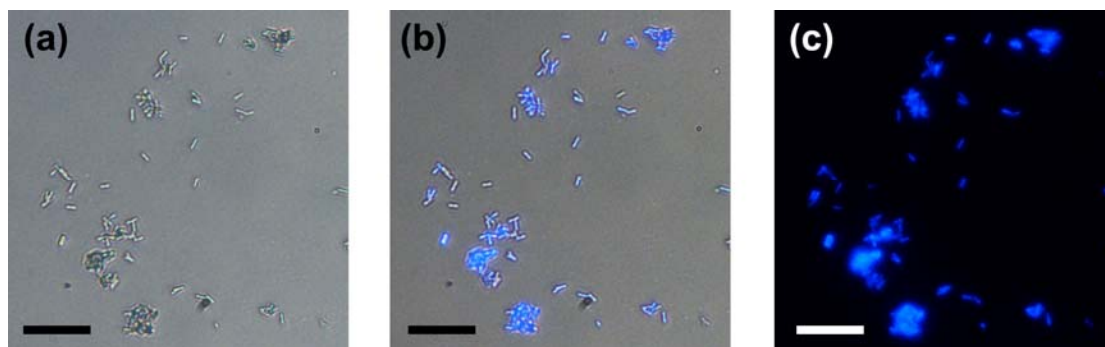

**Fig. S10** Optical images of  $\text{NaYF}_4:\text{Yb,Tm}@\text{TiO}_2$ : (a) Bright-field optical image, (b) Merged bright-field optical image under 980 nm laser irradiation and (c) Dark-field optical image under 980 nm laser irradiation (scale bar: 10  $\mu\text{m}$ ).
